# Supplementary material for: Deep-space glycine formation via Strecker-type reactions activated by ice water dust mantles. A computational approach
Source: Royal Society of Chemistry journal article supplement (doi:10.1039/b923439j), 2010-01-01
Supplement: b923439j.pdf [file b923439j.pdf]

## **Supplementary Information**

### **Deep-space glycine formation via Strecker-type reactions activated by ice water dust mantles. A computational approach.**

*Albert Rimola,<sup>1</sup> Mariona Sodupe,<sup>2\*</sup> and Piero Ugliengo<sup>1\*</sup>*

<sup>1</sup>Dipartimento di Chimica IFM, NIS Centre of Excellence and INSTM (Materials and Technology National Consortium), UdR torino, Università di Torino, Via P. Giuria 7, 10125 Torino, Italy.

<sup>2</sup>Departament de Química, Universitat Autònoma de Barcelona, Bellaterra 08193, Spain.

**\*Corresponding authors. E-mails: [piero.ugliengo@unito.it](mailto:piero.ugliengo@unito.it); [mariona@klignon.uab.es](mailto:mariona@klignon.uab.es)**

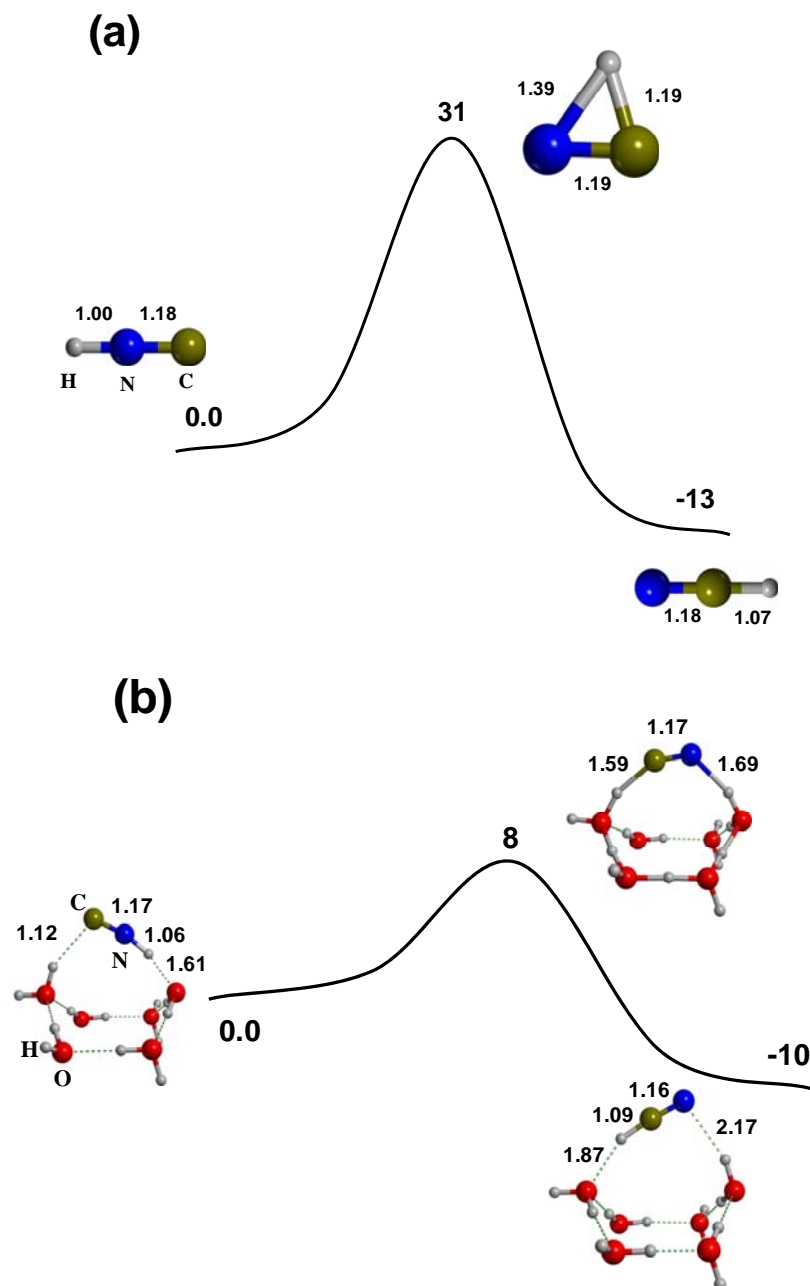

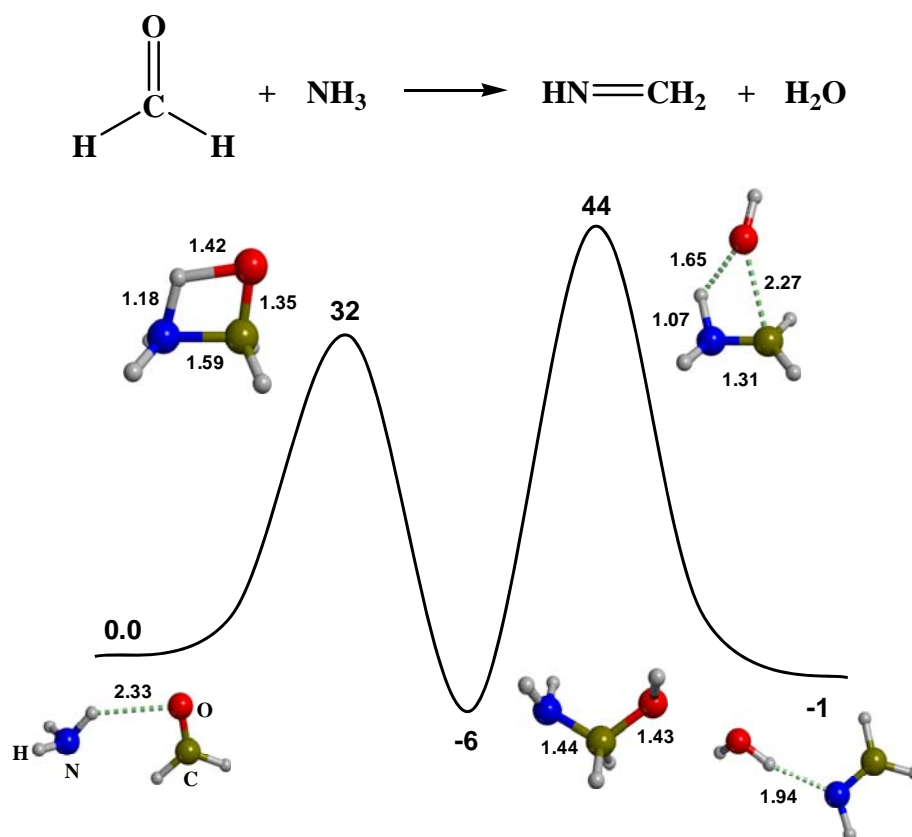

**Figure S2.** B3LYP/6-31+G(d,p) gas-phase ZPE-corrected profile of  $\text{H}_2\text{C}=\text{O} + \text{NH}_3 \rightarrow \text{NH}=\text{CH}_2 + \text{H}_2\text{O}$  following the Strecker mechanism. Relative ZPE-corrected energies in  $\text{kcal mol}^{-1}$ , bond distances in  $\text{\AA}$ .

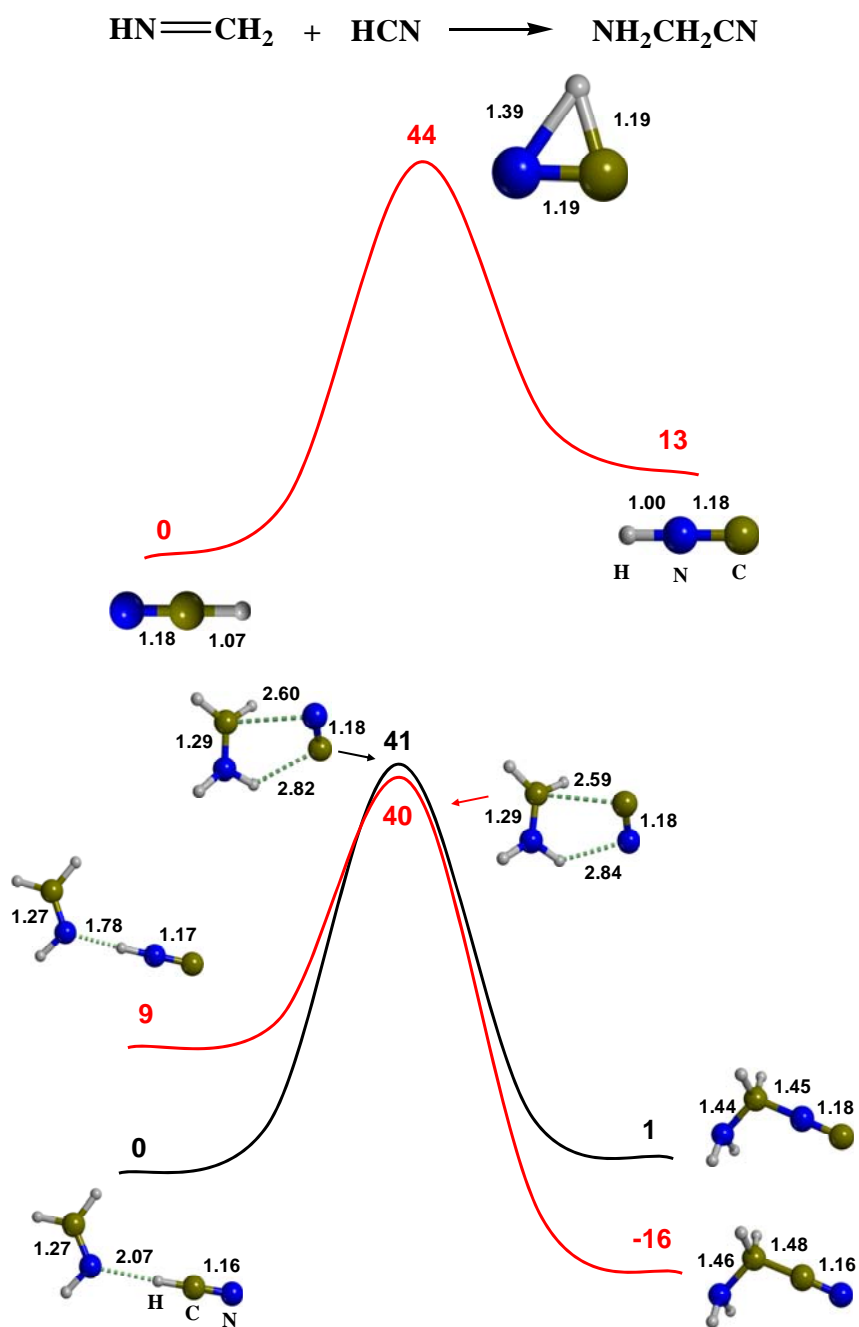

**Figure S3.** B3LYP/6-31+G(d,p) gas-phase ZPE-corrected profile of  $\text{HCN} + \text{NH}=\text{CH}_2 \rightarrow \text{NH}_2\text{CH}_2\text{CN}$  following the Strecker mechanism. Relative ZPE-corrected energies in kcal mol<sup>-1</sup>, bond distances in Å.

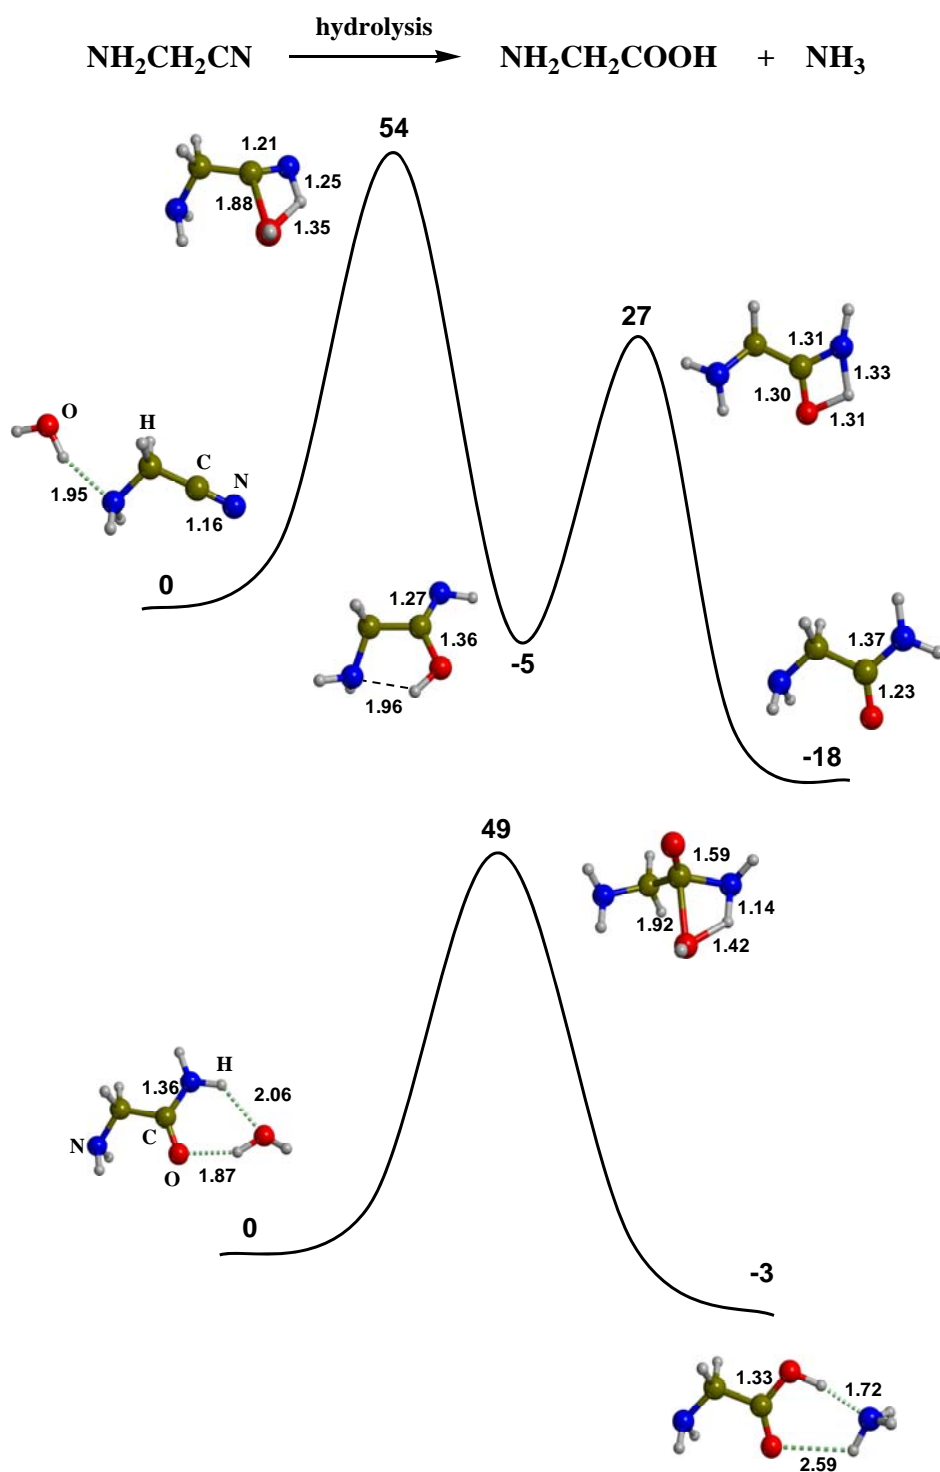

**Figure S4.** B3LYP/6-31+G(d,p) gas-phase ZPE-corrected profile of the hydrolysis of  $\text{NH}_2\text{CH}_2\text{CN}$  to form glycine following the Strecker mechanism. Relative ZPE-corrected energies in  $\text{kcal mol}^{-1}$ , bond distances in  $\text{\AA}$ .

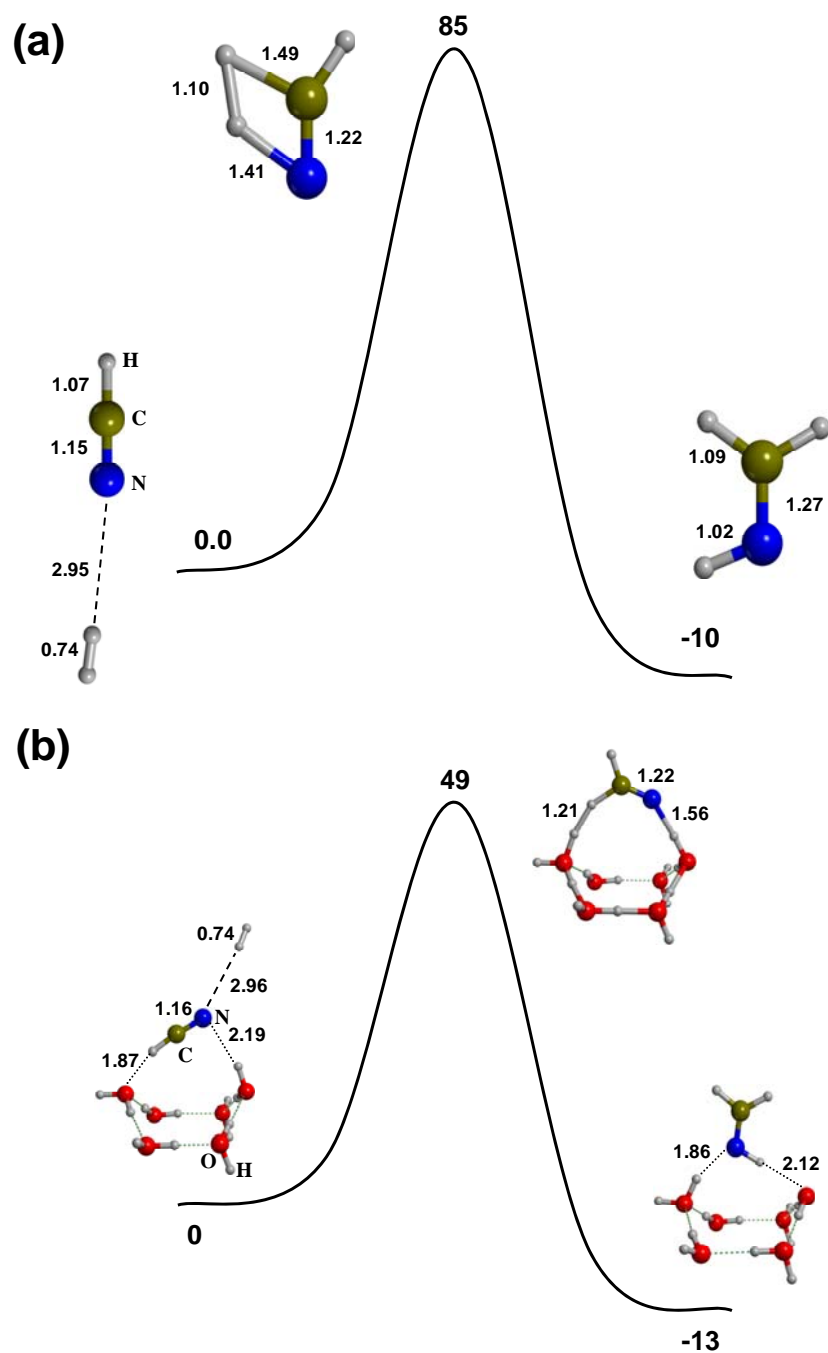

**Figure S5.** B3LYP/6-31+G(d,p) ZPE-corrected profile for the  $\text{H}_2 + \text{HCN} \rightarrow \text{NH}=\text{CH}_2$  reaction: (a) in gas-phase, (b) at the  $\text{H}_2\text{O}$ -ice surface. Relative ZPE-corrected energies in kcal mol<sup>-1</sup>, bond distances in Å.

**Step2-ii (SI)**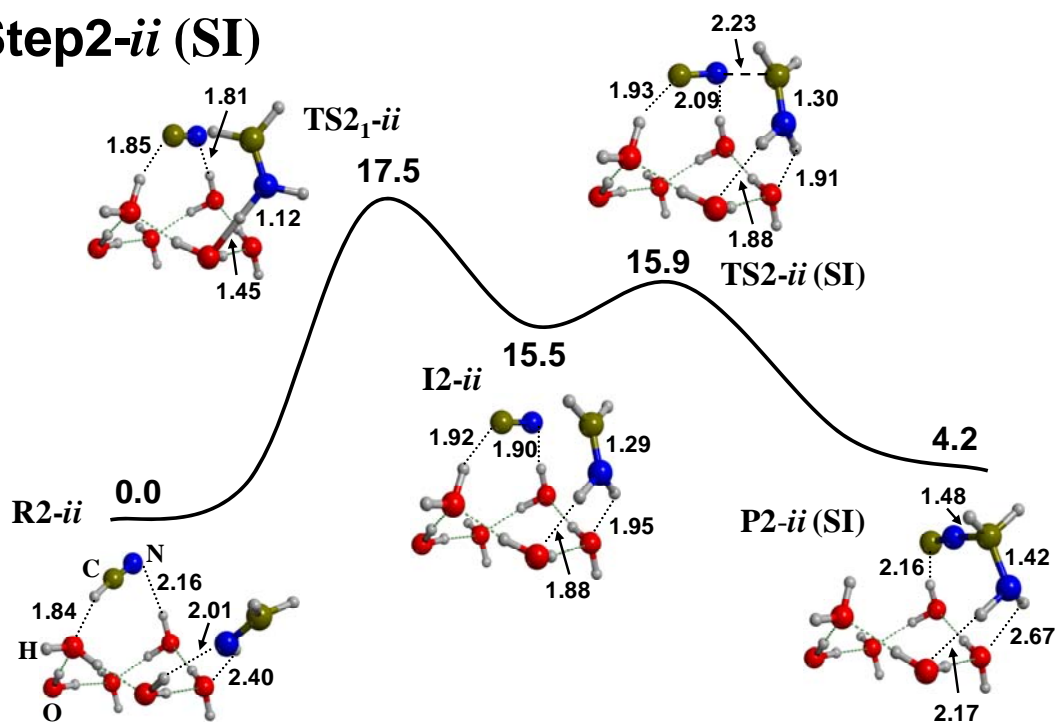

**Figure S6.** B3LYP/6-31+G(d,p) ZPE-corrected profile for the  $\text{NH}=\text{CH}_2 + \text{HCN} \rightarrow \text{NHCH}_2\text{NC}$  reaction at the  $\text{H}_2\text{O}$ -ice surface. Relative ZPE-corrected energies in kcal mol<sup>-1</sup>, bond distances in Å.

**Step4 (SI)**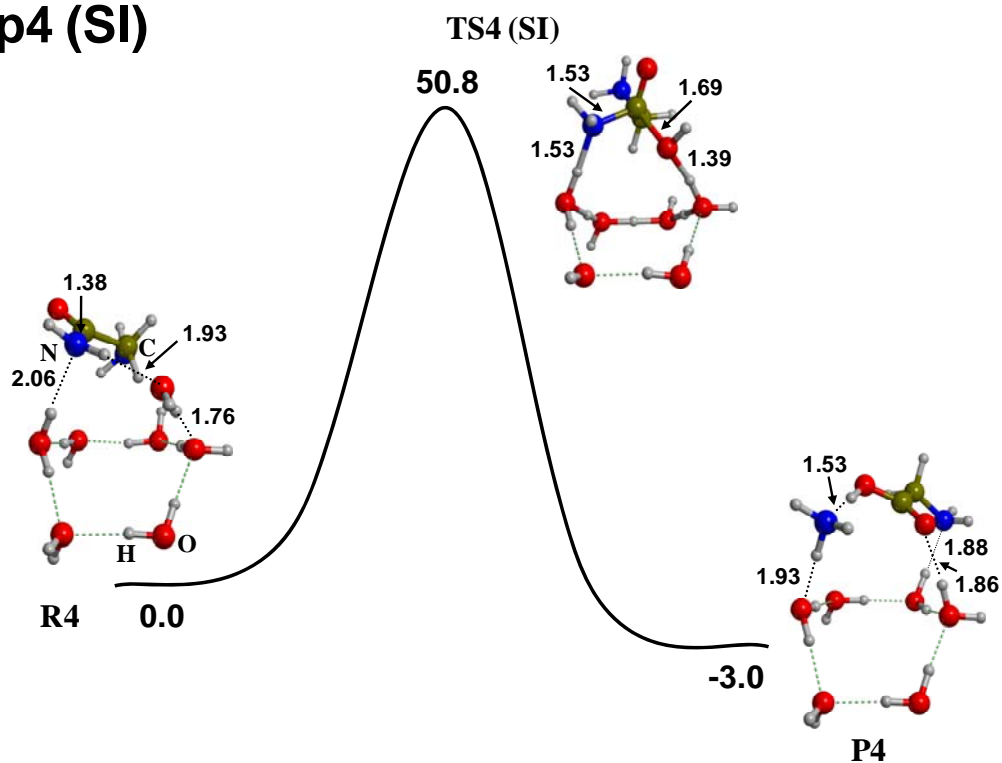

**Figure S7.** B3LYP/6-31+G(d,p) ZPE-corrected profile for the  $\text{NH}_2\text{CH}_2\text{CONH}_2 + \text{H}_2\text{O} \rightarrow \text{NH}_2\text{CH}_2\text{COOH} + \text{NH}_3$  assisted by the  $\text{H}_2\text{O}$ -ice surface. Relative ZPE-corrected energies in kcal mol<sup>-1</sup>, bond distances in Å.
